# Supplementary material for: Association of Plant-Parasitic Nematodes and Soil Physicochemical Properties in Tomatoes in Turfloop, Limpopo Province, South Africa
Source: MDPI journal article supplement (doi:10.3390/horticulturae10040328), 2024-03-28
Supplement: s1 [file s1]

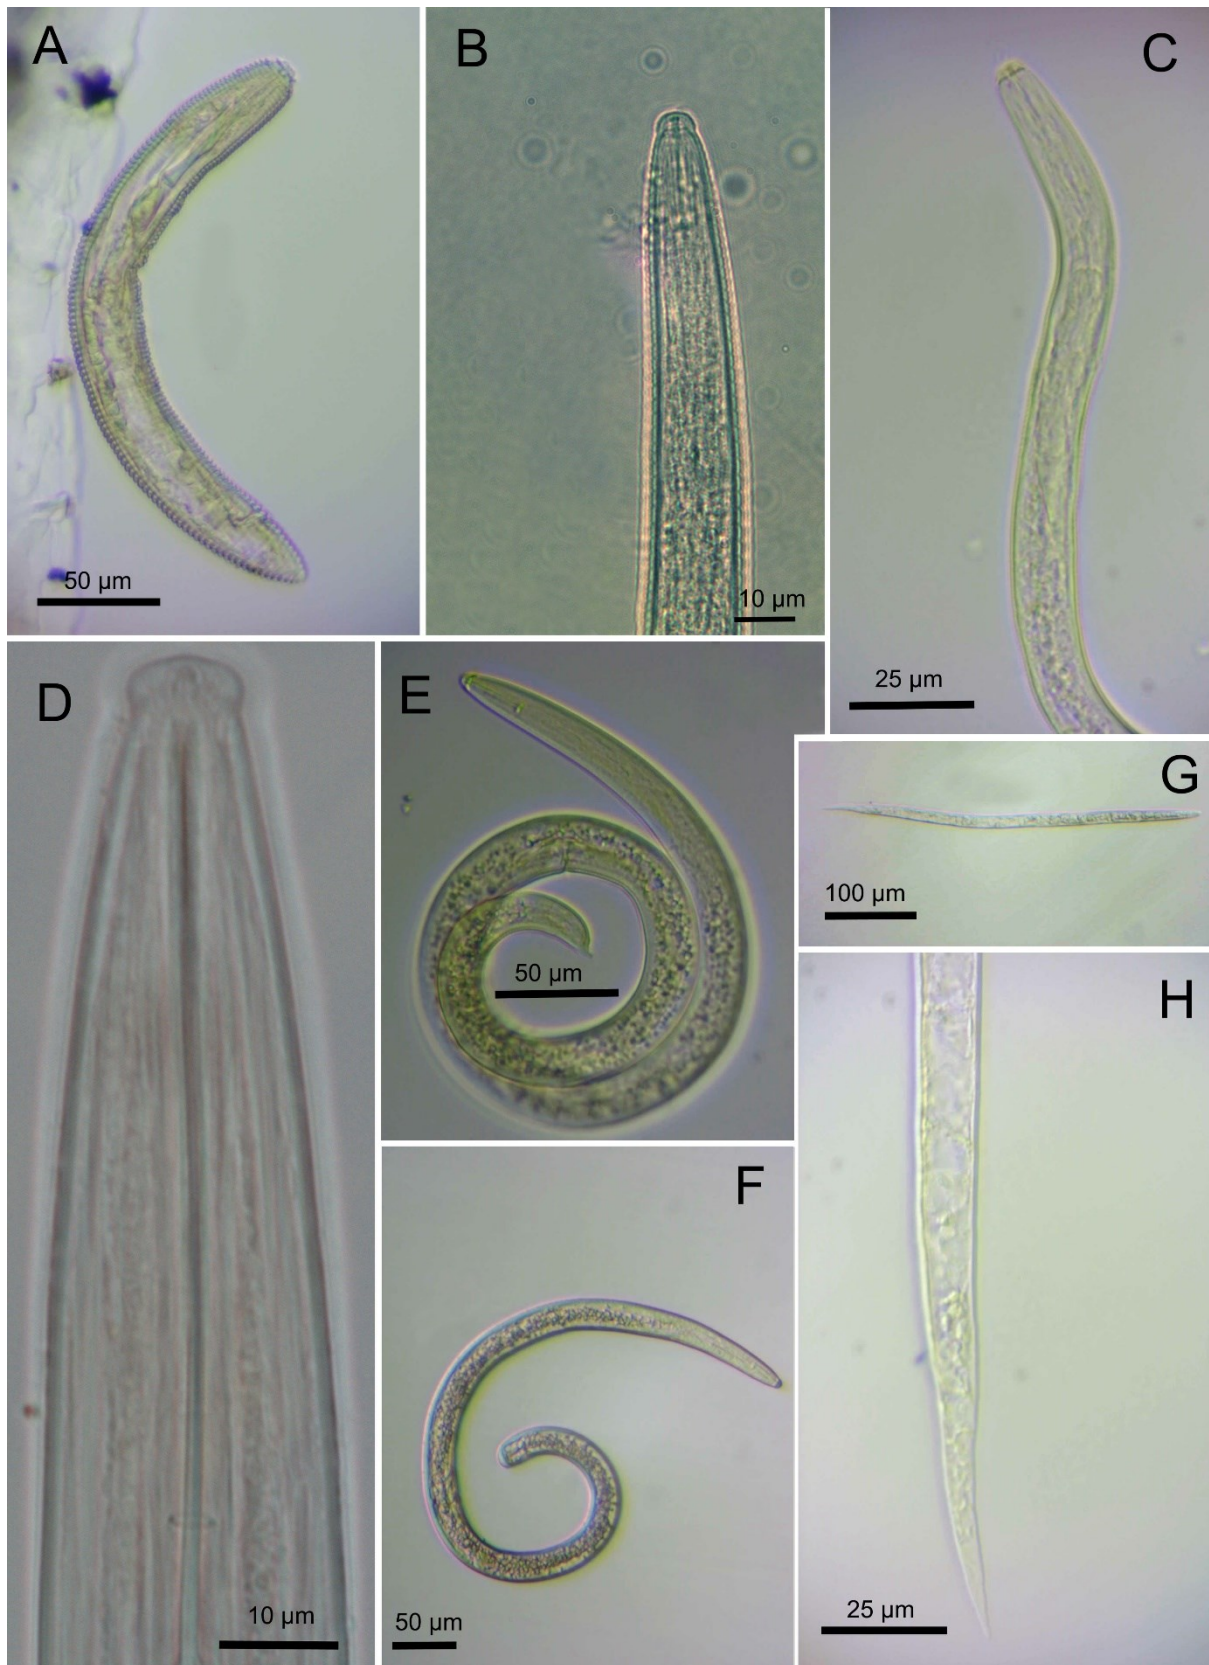

Figure S1. Plant-parasitic nematodes associated with tomato in Turfloop, Limpopo Province, South Africa. A: *Criconema*, B: *Tylenchorhynchus*. C: *Pratylenchus*. D: *Xiphinema*, E: *Helicotylenchus*, F: *Rotylenchus*, G, H: *Meloidogyne*.
